# Supplementary material for: A nitrosyl iron complex with 3.4-dichlorothiophenolyl ligands: synthesis, structures and its reactions with targets – carriers of nitrogen oxide (NO) in vivo
Source: Royal Society of Chemistry journal article supplement (doi:10.1039/d2dt04047f), 2023-01-01

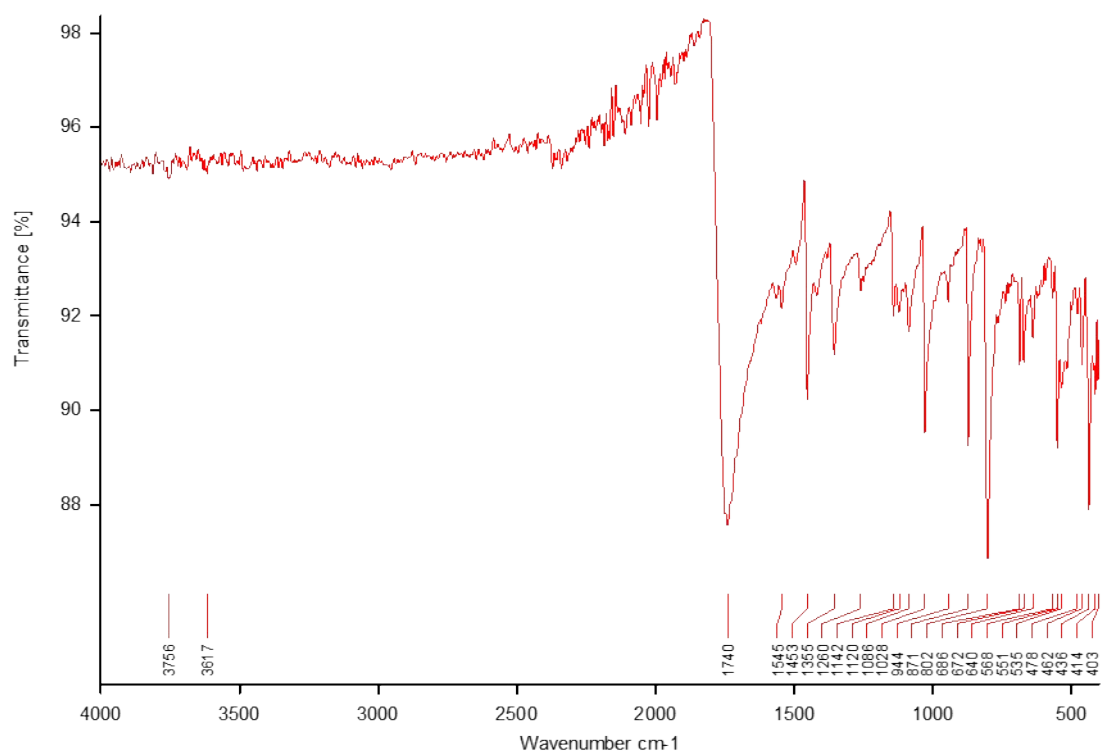

**Fig. S1** IR spectrum of crystalline complex 1.

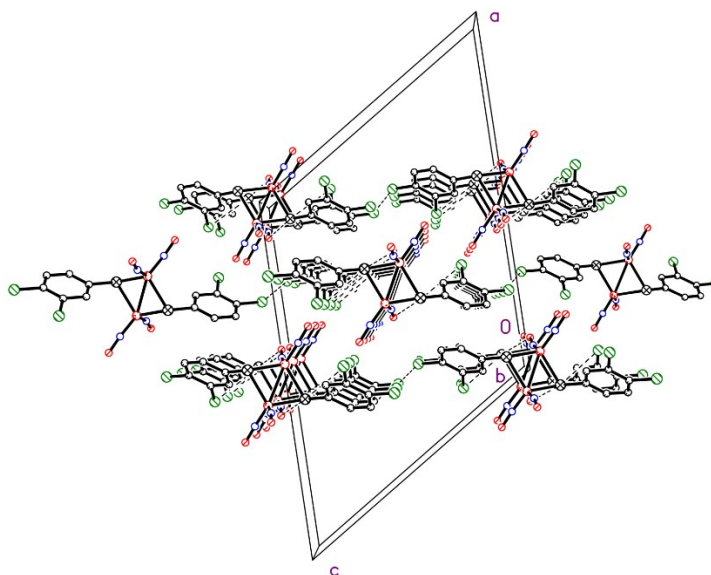

**Fig. S2** Fragment of the crystalline structure of complex 1.

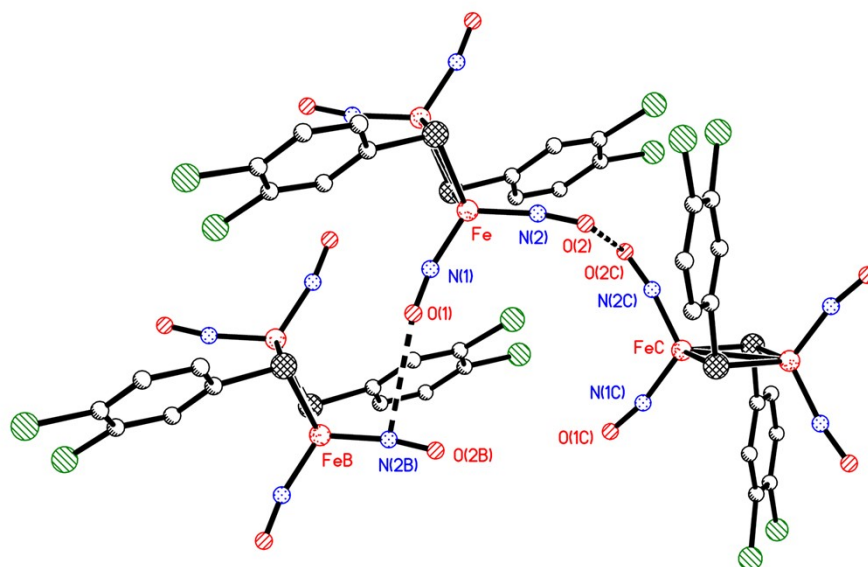

**Fig. S3** Contacts between NO groups in crystal 1.

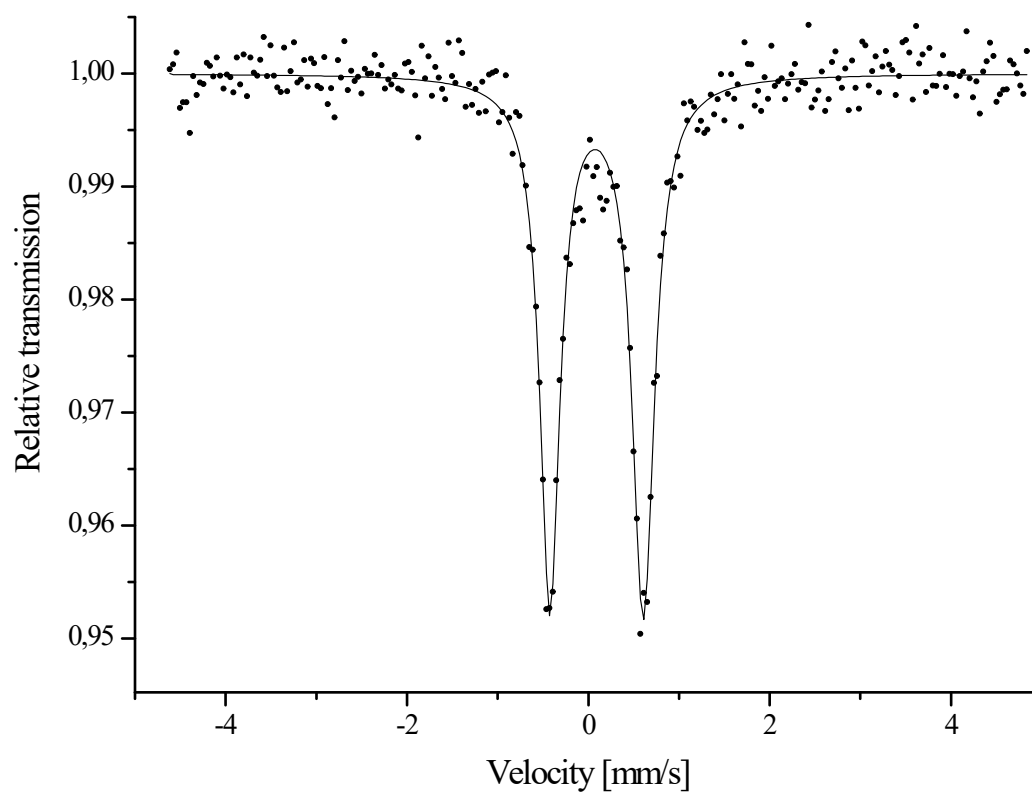

**Fig. S4** Mössbauer spectrum of 1 polycrystals.

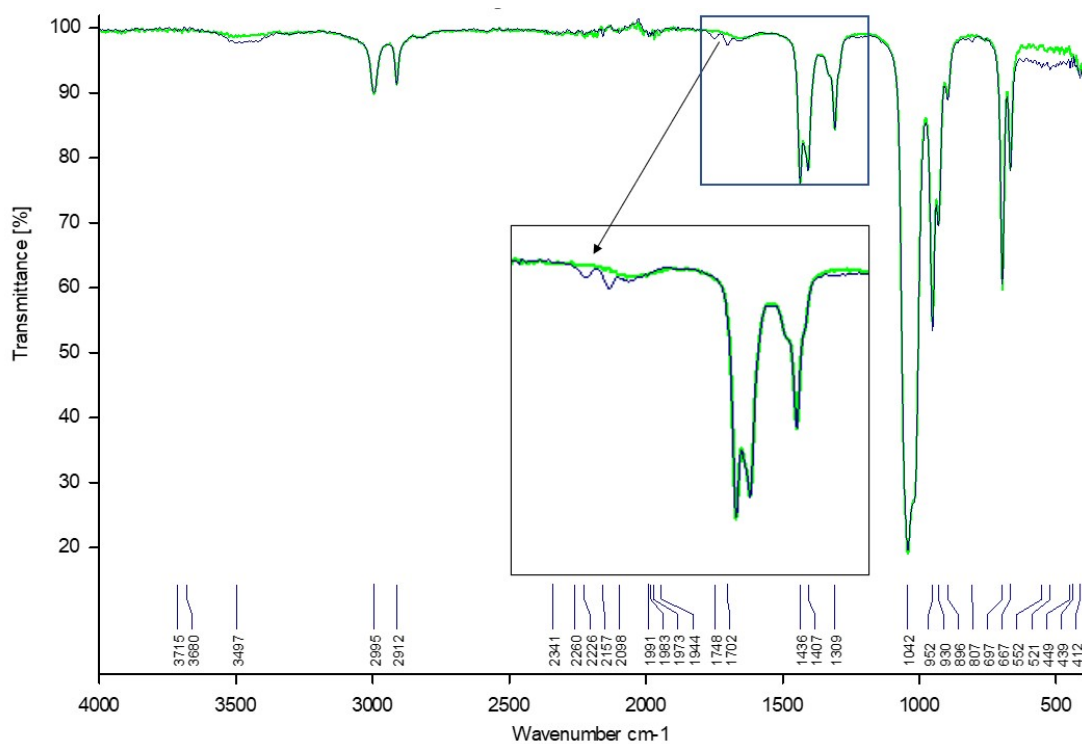

**Fig. S5** Spectrum of complex 1 in DMSO (blue), and pure DMSO (green). Complex 1 concentration is  $2.7 \cdot 10^{-2}$  M.

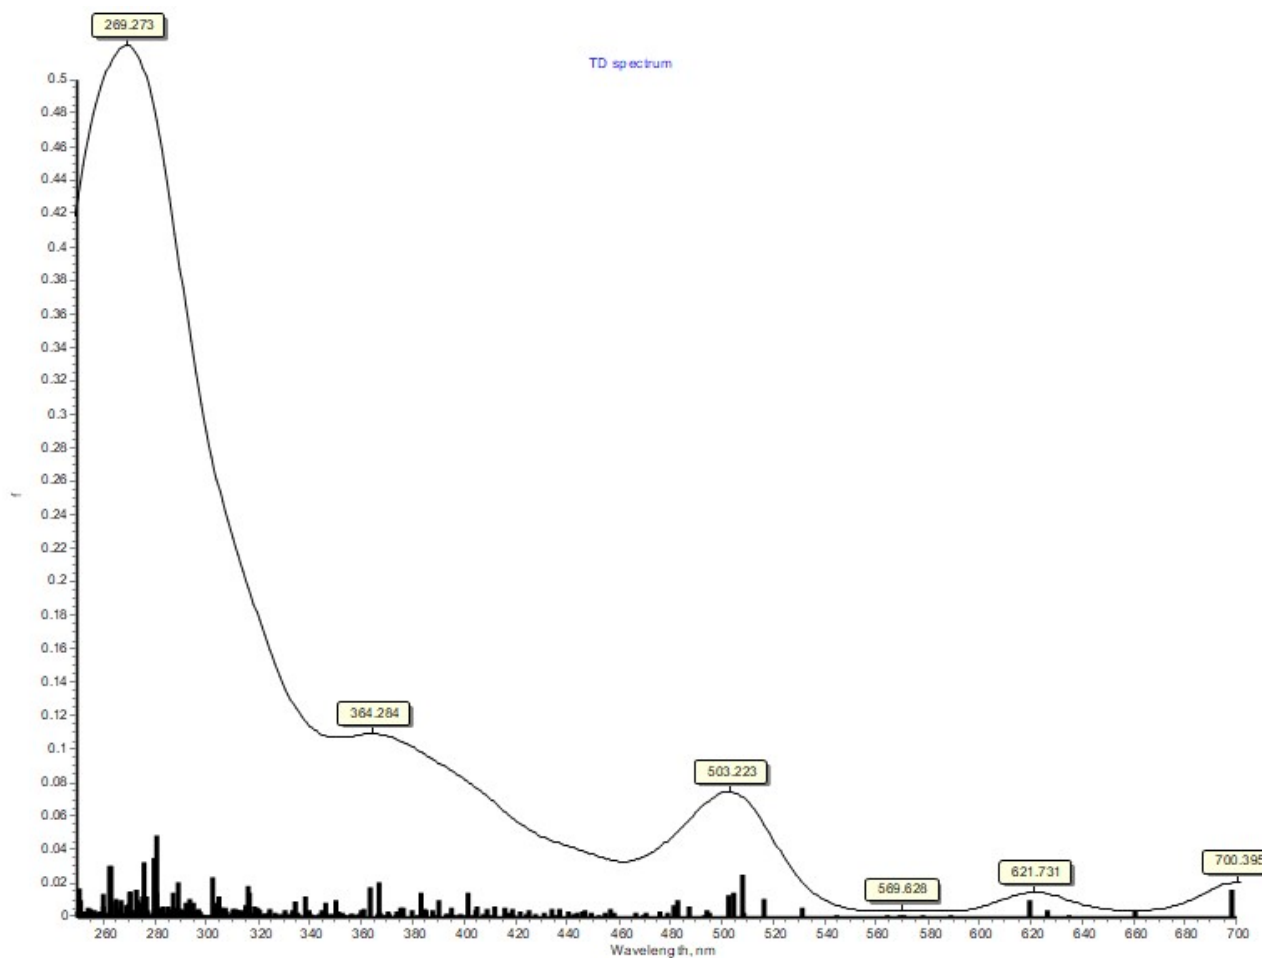

**Fig. S6** Theoretical spectrum of intermediate complex 2

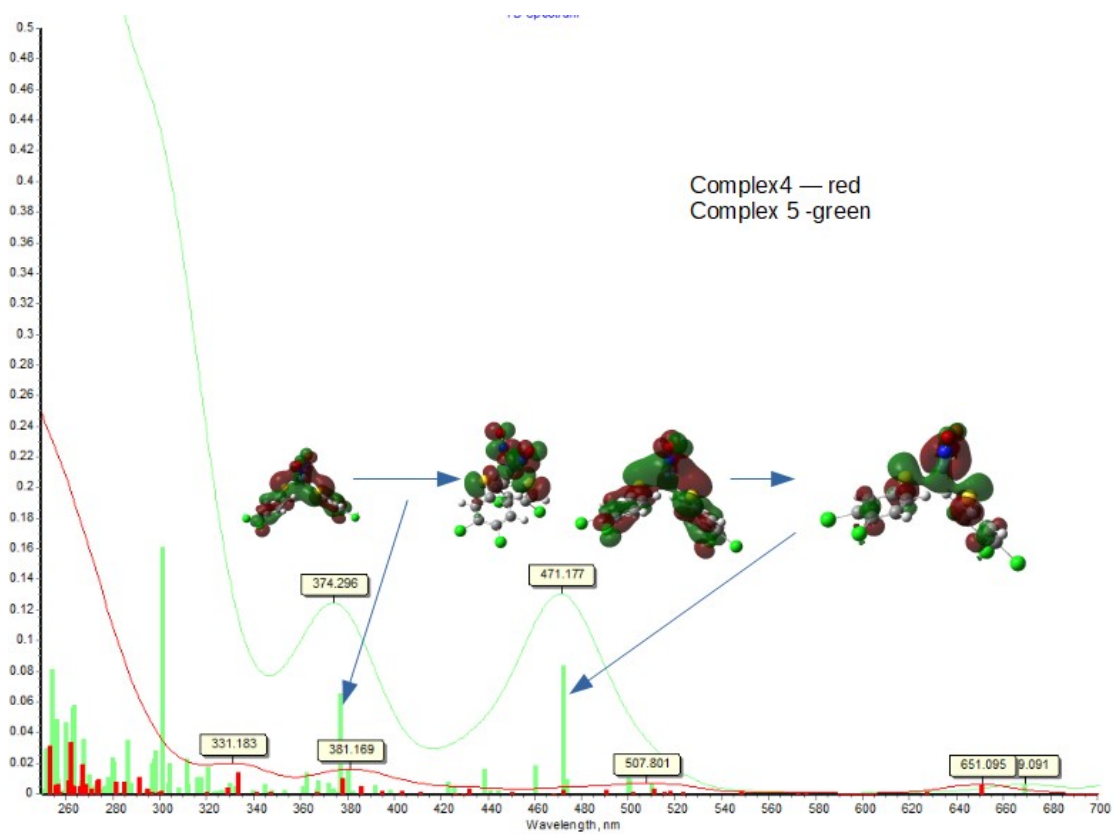

**Fig. S7** Theoretical spectra of complexes 4 and 5.

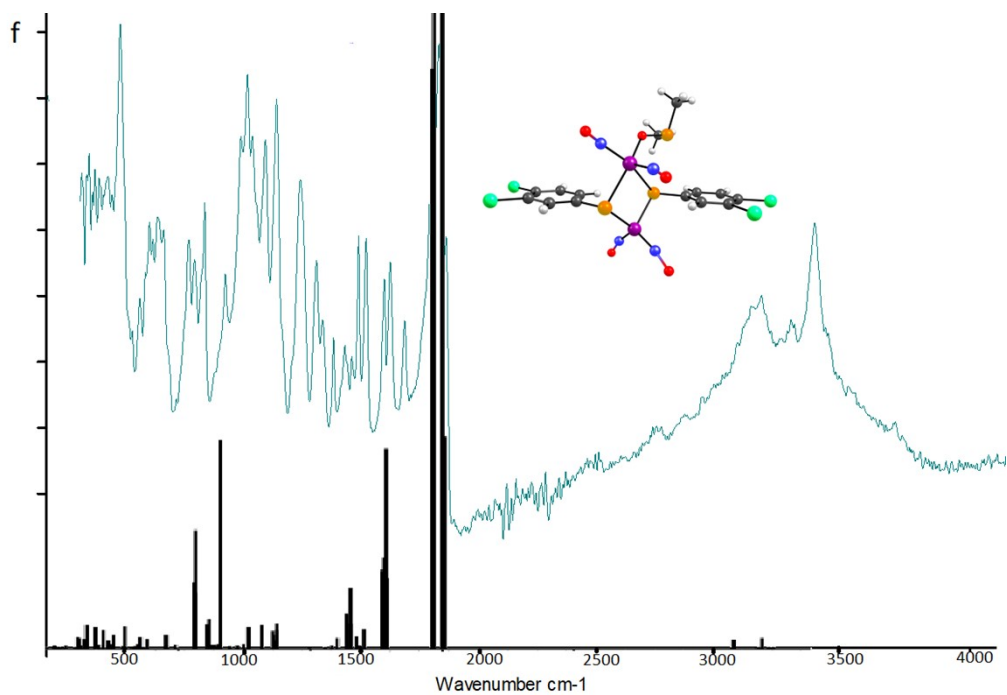

**Fig. S8** IR spectrum of precipitate (blue) and theoretical spectrum of tetranitrosyl binuclear complex with four- and five-coordinated iron atoms (black).

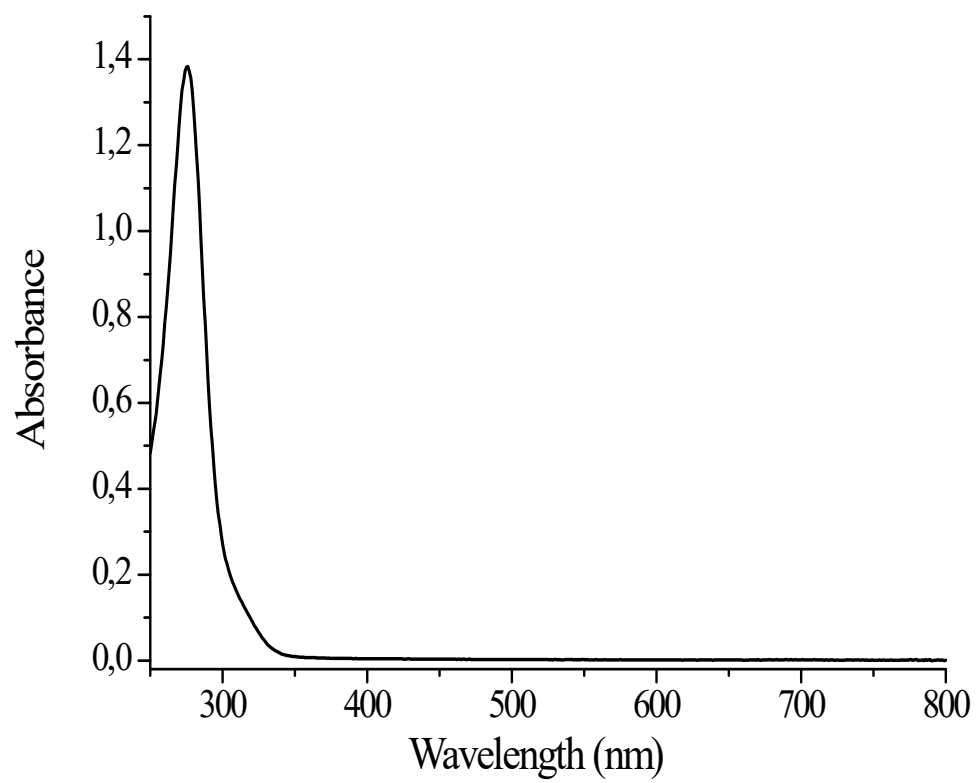

**Fig. S9** UV-Vis spectrum of ligands in buffer. Concentration of ligands in buffer is  $8.3 \cdot 10^{-5}$  M.



**Table S2** Structures of complexes 2, 3, and 3a.

|                                                                                     |                                                                                                                                                          |
|-------------------------------------------------------------------------------------|----------------------------------------------------------------------------------------------------------------------------------------------------------|
| 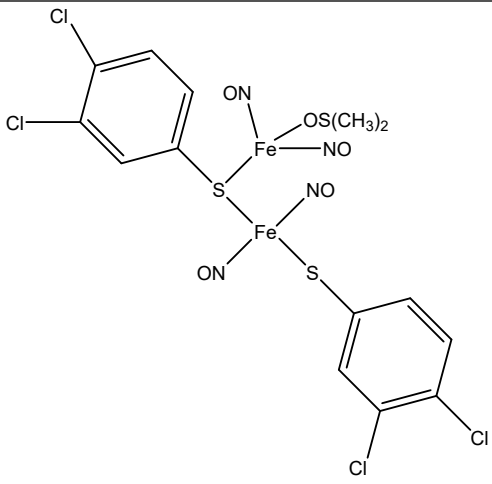   | <p>Complex 2<br/>[Fe<sub>2</sub>(SC<sub>6</sub>H<sub>3</sub>Cl<sub>2</sub>)<sub>2</sub>(NO)<sub>4</sub>(OS(CH<sub>3</sub>)<sub>2</sub>)<sub>2</sub>]</p> |
|   | <p>Complex 3<br/>[Fe(SC<sub>6</sub>H<sub>3</sub>Cl<sub>2</sub>)(NO)<sub>2</sub>(OS(CH<sub>3</sub>)<sub>2</sub>)<sub>2</sub>]</p>                         |
|  | <p>Complex 3a<br/>[Fe(SC<sub>6</sub>H<sub>3</sub>Cl<sub>2</sub>)(NO)<sub>2</sub>(H<sub>2</sub>O)]</p>                                                    |

**Table S3** Comparison of NO-bonds parameters from NBO.

| Complex | r     |       | Wiberg index |       | Bond order |       |
|---------|-------|-------|--------------|-------|------------|-------|
|         |       |       |              |       |            |       |
| 3       | 1.699 | 1.699 | 1.244        | 1.236 | 1.606      | 1.588 |
| 6       | 1.792 | 1.723 | 1.098        | 1.215 | 1.308      | 1.429 |
| 7       | 1.829 | 1.744 | 1.086        | 1.199 | 1.247      | 1.371 |

**Scheme S1** The reaction of formation of an insoluble binuclear complex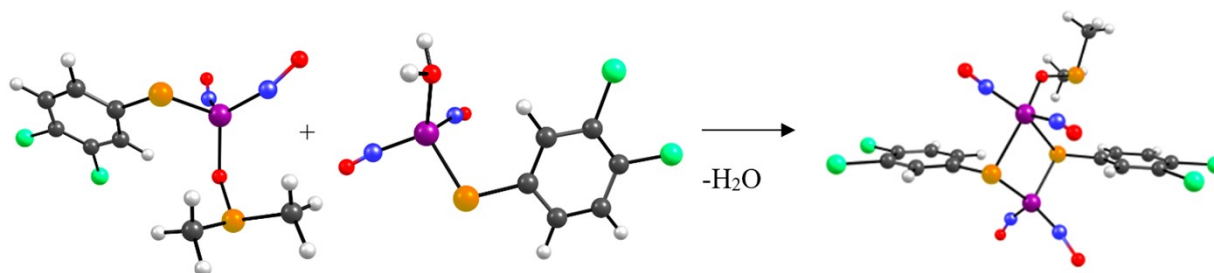

Supplement: d2dt04047f1.pdf [file d2dt04047f1.pdf]
